# Supplementary material for: Ultrathin Rh nanosheets as a highly efficient bifunctional electrocatalyst for isopropanol-assisted overall water splitting
Source: Royal Society of Chemistry journal article supplement (doi:10.1039/c9nr02153a), 2019-01-01
Supplement: c9nr02153a1.pdf [file c9nr02153a1.pdf]

## Electronic Supporting Information

### **Ultrathin Rh nanosheets as highly efficient bifunctional electrocatalyst for the isopropanol-assisted overall water splitting**

Yue Zhao,<sup>‡a</sup> Shihui Xing,<sup>‡a</sup> Xinying Meng,<sup>a</sup> Jinghui Zeng,<sup>a</sup> Shibin Yin,<sup>b</sup>

Xifei Li,<sup>c</sup> and Yu Chen<sup>a,\*</sup>

*<sup>a</sup> Key Laboratory of Macromolecular Science of Shaanxi Province, Key Laboratory of Applied Surface and Colloid Chemistry (Ministry of Education), Shaanxi Key Laboratory for Advanced Energy Devices, School of Materials Science and Engineering, Shaanxi Normal University, Xi'an 710062, PR China*

*<sup>b</sup> Collaborative Innovation Center of Sustainable Energy Materials, Guangxi Key Laboratory of Electrochemical Energy Materials, Guangxi University, Nanning 530004, P. R. China*

*<sup>c</sup> Institute of Advanced Electrochemical Energy, Xi'an University of Technology, Xi'an 710048, P. R. China*

*\*Corresponding author*

*E-mail: ndchenyu@gmail.com*

## **Experimental section**

### **Reagents and chemicals**

Rhodium (III) chloride hydrate ( $\text{RhCl}_3 \cdot 3\text{H}_2\text{O}$ ), potassium hydroxide (KOH), potassium ferricyanide ( $\text{K}_3\text{Fe}(\text{CN})_6$ ), and formaldehyde (HCHO) were purchased from Adamas Reagent Co., Ltd.. The commercial Pt nanocrystals (Pt-NCs) was purchased from Johnson Matthey Corporation.

### **Preparation of Rh-NSs**

In a typical synthesis, the 3 mL of mixture solution containing 0.15 M  $\text{RhCl}_3$  and 0.15 M  $\text{K}_3\text{Fe}(\text{CN})_6$  was heated at 80 °C for 8 h, which induced the generation of jelly-like  $\text{RhCl}_3$ - $\text{K}_3\text{Fe}(\text{CN})_6$  cyanogel. After cooling, 2.0 mL of HCHO was added in the  $\text{RhCl}_3$ - $\text{K}_2\text{Fe}(\text{CN})_6$  cyanogel. Then, the mixture was heated at 200 °C for 6 h, which induced the generation of Rh-NNs. After reaction, Rh-NSs were washed with 0.01 M HCl solution and water, and the dried at 60 °C for 8 h.

### **Electrochemical measurements**

Various electrochemical measurements, such as CV, LSV, EIS, and chronopotentiometry, tests, were performed on CHI-660 electrochemical analyser at 30 °C. In a three-electrode cell, carbon rod, the saturated calomel electrode, catalyst-modified glassy carbon electrode were used as the auxiliary electrode, reference electrode, working electrode, respectively. The catalyst ink-transfer method was used to prepare the working electrode. The catalyst ink was got ready by dispersing 2 mg of the catalyst in 1.0 mL of water. The 4  $\mu\text{L}$  of the catalyst ink was loaded onto the electrode surface and dried at room temperature. Then, 4  $\mu\text{L}$  of Nafion solution (0.05 wt%) was coated on the electrode surface and dried at room temperature. The metal loading density on working electrode was  $0.11 \text{ mg cm}^{-2}$ .

### **Physical characterization**

Transmission electron microscopy (TEM), high-resolution TEM (HRTEM), energy-dispersive X-ray (EDX) maps, and selected area electron diffraction (SAED) were carried out with a TECNAI G2 F20 instrument. Scanning electron microscopy (SEM) and EDX analysis were conducted with an SU-8020 instrument. N<sub>2</sub> adsorption/desorption isotherm test was performed on a Micro-meritics ASAP 2020

HD88 physical adsorption instrument. X-ray diffraction (XRD) were performed on a DX-2700 power X-ray diffractometer. X-ray photoelectron spectroscopy (XPS) was conducted on an AXIS ULTRA spectrometer, and the binding energy was calibrated with C 1s peak at 284.6 eV. Atomic force microscopy (AFM) was carried out with a Dimension Icon instrument.

## Figures and captions

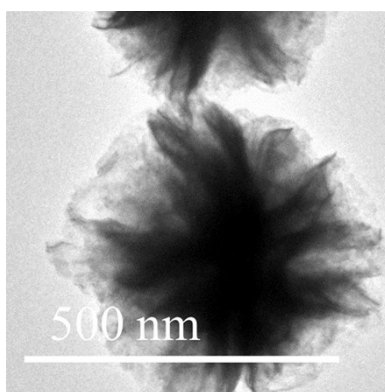

**Fig. S1** TEM image of Rh-NSs after chronoamperometry test.

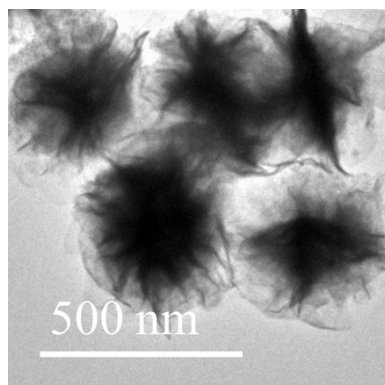

**Fig. S2** TEM image of Rh-NSs after chronoamperometry test.

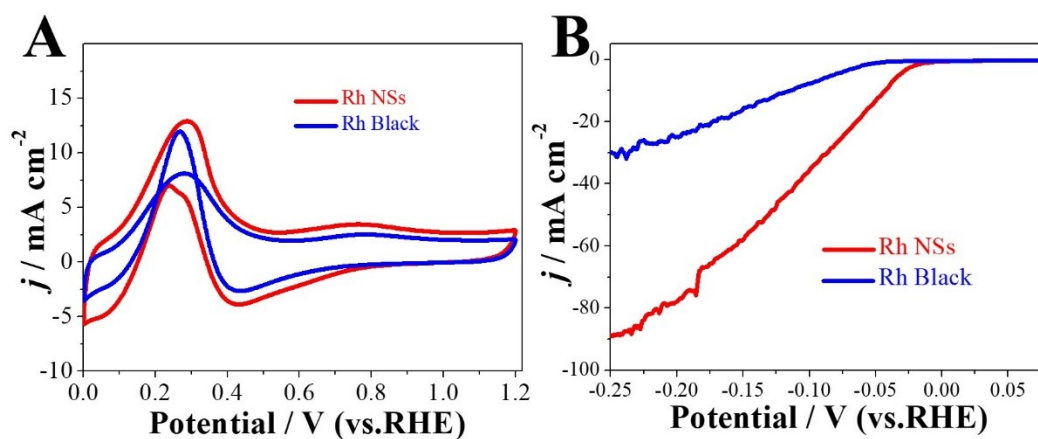

**Fig. S3** (A) CV curves of Rh-NSs and Rh black in Ar-saturated 1.0 M KOH solution with 1.0 isopropanol at  $50 \text{ mV s}^{-1}$ . (B) LSV polarization curves of Rh-NSs and Rh black in Ar-saturated 1.0 M KOH solution at  $5 \text{ mV s}^{-1}$ .

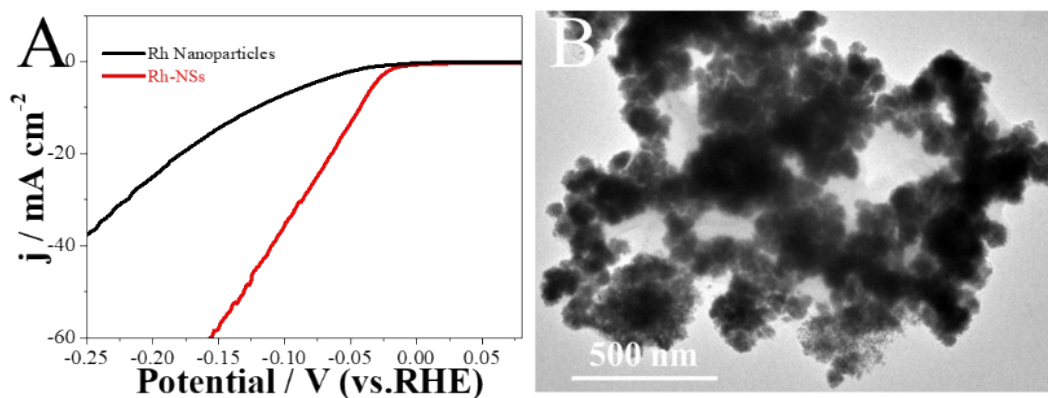

**Fig. S4** (A) LSV polarization curves of Rh-NSs and spherical Rh nanoparticles in Ar-saturated 1.0 M KOH solution. (B) TEM image of spherical Rh nanoparticles. Herein, spherical Rh nanoparticles was synthesized by replacing  $\text{RhCl}_3\text{-K}_3\text{Fe}(\text{CN})_6$  cyanogel with  $\text{RhCl}_3$  solution as the reaction precursor under same experimental conditions.

**Table S1.** HER activity of various precious metal based electrocatalysts in KOH solution.

| Catalysts                                                                           | Electrolyte           | $\eta_{10}$ value | Ref. (year)        |
|-------------------------------------------------------------------------------------|-----------------------|-------------------|--------------------|
| Rh-NSs                                                                              | 1 M KOH               | 43 mV             | This work          |
| Pd nanonetwork                                                                      | 1 M KOH               | 110 mV            | 2017 <sup>1</sup>  |
| Mo <sub>2</sub> C@NC@Pt nanospheres                                                 | 1 M KOH               | 47 mV             | 2019 <sup>2</sup>  |
| Ir <sub>0.80</sub> Ru <sub>0.20</sub> O <sub>y</sub>                                | 1 M NaOH              | ca. 45 mV         | 2017 <sup>3</sup>  |
| PtO <sub>a</sub> PdO <sub>b</sub> NPs@Ti <sub>3</sub> C <sub>2</sub> T <sub>x</sub> | 0.1 M KOH             | 57 mV             | 2018 <sup>4</sup>  |
| Pd@Ru core@shell nanorods                                                           | 1 M KOH               | 30 mV             | 2018 <sup>5</sup>  |
| Modified Pt(111) by Ni(OH) <sub>2</sub>                                             | 0.1 M NaOH            | 88 mV             | 2019 <sup>6</sup>  |
| NiCo <sub>2</sub> S <sub>4</sub> /Pd heterostructure                                | 1 M KOH               | 83 mV             | 2018 <sup>7</sup>  |
| Pt/NiO@Ni/NF nanocomposite                                                          | 1 M KOH               | 34 mV             | 2018 <sup>8</sup>  |
| Pt-Co(OH) <sub>2</sub> nanosheet                                                    | 1 M KOH               | 32 mV             | 2017 <sup>9</sup>  |
| Rh nanocrystal at carbon nanotubes                                                  | 1 M KOH               | 48 mV             | 2018 <sup>10</sup> |
| Ultrafine Pt nanoparticles at CoS <sub>2</sub> nanosheet                            | 1 M KOH               | 24 mV             | 2018 <sup>11</sup> |
| Au doping in Co-Ni hydroxide                                                        | 1 M KOH               | 35 mV             | 2018 <sup>12</sup> |
| Ru nanoparticles on nitrogen-doped GnP                                              | 1 M KOH               | 22 mV             | 2018 <sup>13</sup> |
| Pt-Ni anisotropic superstructures                                                   | 1 M KOH               | 27.7 mV           | 2018 <sup>14</sup> |
| Ultrathin Pt/Ni alloy nanowires                                                     | 0.1 M KOH             | 38 mV             | 2018 <sup>15</sup> |
| Palladium phosphide                                                                 | 1 M KOH               | 35.4 mV           | 2018 <sup>16</sup> |
| N,P dual-doped carbon-encapsulated ruthenium diphosphide nanoparticle               | 1 M KOH               | 52 mV             | 2017 <sup>17</sup> |
| Ru nanodendrites                                                                    | 1 M KOH               | 43.3 mV           | 2018 <sup>18</sup> |
| Ru-doped Ni-Co bimetal phosphides                                                   | 1 M KOH               | 52 mV             | 2017 <sup>19</sup> |
| Fe-Pt mesoporous films                                                              | 1 M KOH               | 74 mV             | 2018 <sup>20</sup> |
| Pt nanostructure at N-Doped carbon                                                  | 0.5 M KOH             | 51 mV             | 2018 <sup>21</sup> |
| Pt nanoparticles at 2D-Ni(OH) <sub>2</sub> nanosheets                               | 0.1 M KOH             | ca. 118 mV        | 2018 <sup>22</sup> |
| Pristine Ru-based electrode                                                         | 0.1 M KOH             | 150 mV            | 2019 <sup>23</sup> |
| Ni(OH) <sub>2</sub> -PtO <sub>2</sub> hybrid nanosheet array                        | 1 M KOH               | 100 mV            | 2018 <sup>24</sup> |
| 3D nanoporous Ag@Pd core@shell hybrids                                              | 1 M KOH               | 23.8 mV           | 2018 <sup>25</sup> |
| Open hollow Co-Pt bimetallic nanoclusters                                           | 1 M KOH               | 50 mV             | 2018 <sup>26</sup> |
| Pt nanoparticles at NiFe hydroxide                                                  | 1 M KOH               | 101 mV            | 2017 <sup>27</sup> |
| Pd nanoparticles on TiO <sub>2</sub> nanotube                                       | 1 M HClO <sub>4</sub> | 38 mV             | 2018 <sup>28</sup> |
| Pt-Mn nanocubes on Ni(OH) <sub>2</sub> nanosheets                                   | 0.1 M NaOH            | ca. 100 mV        | 2018 <sup>29</sup> |
| Rh tetrahedron                                                                      | 1 M KOH               | 43 mV             | 2017 <sup>30</sup> |

|                                                           |           |            |                    |
|-----------------------------------------------------------|-----------|------------|--------------------|
| Rh concave tetrahedra                                     | 1 M KOH   | ca. 75 mV  | 2017 <sup>30</sup> |
| Single-atom Pt <sub>1</sub> onto Fe-N <sub>4</sub> center | 1 M KOH   | ca. 110 mV | 2018 <sup>31</sup> |
| PtCo alloy at Co nanowire array                           | 1 M KOH   | 28 mV      | 2018 <sup>32</sup> |
| Pt-decorated Ni <sub>3</sub> N nanosheets                 | 1 M KOH   | ca. 50 mV  | 2017 <sup>33</sup> |
| Octahedral Pt-Co alloy nanocrystals                       | 0.1 M KOH | ca. 50 mV  | 2017 <sup>34</sup> |

## References

1. H. Begum, M. S. Ahmed and S. Jeon, *ACS Appl. Mater. Interfaces*, 2017, **9**, 39303-39311.
2. J. Chi, J. Xie, W. Zhang, B. Dong, J. Qin, X. Zhang, J. Lin, Y. Chai and C. Liu, *ACS Appl. Mater. Interfaces*, 2019, **11**, 4047-4056.
3. Y. B. Cho, A. Yu, C. Lee, M. H. Kim and Y. Lee, *ACS Appl. Mater. Interfaces*, 2018, **10**, 541-549.
4. B. Cui, B. Hu, J. Liu, M. Wang, Y. Song, K. Tian, Z. Zhang and L. He, *ACS Appl. Mater. Interfaces*, 2018, **10**, 23858-23873.
5. Y. Luo, X. Luo, G. Wu, Z. Li, G. Wang, B. Jiang, Y. Hu, T. Chao, H. Ju, J. Zhu, Z. Zhuang, Y. Wu, X. Hong and Y. Li, *ACS Appl. Mater. Interfaces*, 2018, **10**, 34147-34152.
6. F. J. Sarabia, P. Sebastian-Pascual, M. T. M. Koper, V. Climent and J. M. Feliu, *ACS Appl. Mater. Interfaces*, 2019, **11**, 613-623.
7. G. Sheng, J. Chen, Y. Li, H. Ye, Z. Hu, X. Fu, R. Sun, W. Huang and C. Wong, *ACS Appl. Mater. Interfaces*, 2018, **10**, 22248-22256.
8. Z. Chen, G. Cao, L. Gan, H. Dai, N. Xu, M. Zang, H. Dai, H. Wu and P. Wang, *ACS Catal.*, 2018, **8**, 8866-8872.
9. Z. Xing, C. Han, D. Wang, Q. Li and X. Yang, *ACS Catal.*, 2017, **7**, 7131-7135.
10. W. Zhang, X. Zhang, L. Chen, J. Dai, Y. Ding, L. Ji, J. Zhao, M. Yan, F. Yang, C. Chang and S. J. Guo, *ACS Catal.*, 2018, **8**, 8092-8099.
11. X. Han, X. Wu, Y. Deng, J. Liu, J. Lu, C. Zhong and W. Hu, *Adv. Energy Mater.*, 2018, **8**, 1800935.
12. U. K. Sultana, J. D. Riches and A. P. O'Mullane, *Adv. Funct. Mater.*, 2018, **28**, 1870306.
13. F. Li, G. Han, H. J. Noh, I. Ahmad, I. Y. Jeon and J. B. Baek, *Adv. Mater.*, 2018, **30**, 1803676.
14. Z. Zhang, G. Liu, X. Cui, B. Chen, Y. Zhu, Y. Gong, F. Saleem, S. B. Xi, Y. Du, A. Borgna, Z. Lai, Q. Zhang, B. Li, Y. Zong, Y. Han, L. Gu and H. Zhang, *Adv. Mater.*, 2018, **30**, 1801741.
15. Z. Liu, J. Qi, M. Liu, S. Zhang, Q. Fan, H. Liu, K. Liu, H. Zheng, Y. Yin and C. Gao, *Angew. Chem. Int. Edit.*, 2018, **57**, 11678-11682.
16. F. Luo, Q. Zhang, X. Yu, S. Xiao, Y. Ling, H. Hu, L. Guo, Z. Yang, L. Huang, W. Cai and H. Cheng, *Angew. Chem. Int. Edit.*, 2018, **57**, 14862-14867.
17. Z. Pu, I. S. Amiinu, Z. K. Kou, W. Q. Li and S. Mu, *Angew. Chem. Int. Edit.*, 2017, **56**, 11559-11564.
18. K. Gao, Y. Wang, Z. Wang, Z. Zhu, J. Wang, Z. Luo, C. Zhang, X. Huang, H. Zhang and W. Huang, *Chem. Commun.*, 2018, **54**, 4613-4616.

19. S. Liu, Q. Liu, Y. Lv, B. Chen, Q. Zhou, L. Wang, Q. Zheng, C. Che and C. Chen, *Chem. Commun.*, 2017, **53**, 13153-13156.
20. E. Isarain-Chavez, M. D. Baro, C. Alcantara, S. Pane, J. Sort and E. Pellicer, *ChemSusChem*, 2018, **11**, 367-375.
21. M. K. Kundu, T. Bhowmik, R. Mishra and S. Barman, *ChemSusChem*, 2018, **11**, 2388-2401.
22. B. Ruqia and S. I. Choi, *ChemSusChem*, 2018, **11**, 2643-2653.
23. F. M. Mota, C. H. Choi, R. Boppella, J. E. Lee and D. H. Kim, *J. Mater. Chem. A*, 2019, **7**, 639-646.
24. L. Xie, X. Ren, Q. Liu, G. Cui, R. Ge, A. M. Asiri, X. Sun, Q. Zhang and L. Chen, *J. Mater. Chem. A*, 2018, **6**, 1967-1970.
25. C. Yang, H. Lei, W. Zhou, J. Zeng, Q. Zhang, Y. Hua and C. Xu, *J. Mater. Chem. A*, 2018, **6**, 14281-14290.
26. H. Zhang, Y. Liu, H. Wu, W. Zhou, Z. Kou, S. J. Pennycook, J. Xie, C. Guan and J. Wang, *J. Mater. Chem. A*, 2018, **6**, 20214-20223.
27. S. Anantharaj, K. Karthick, M. Venkatesh, T. Simha, A. S. Salunke, L. Ma, H. Liang and S. Kundu, *Nano Energy*, 2017, **39**, 30-43.
28. U. Lacnjevac, R. Vasilic, T. Tokarski, G. Cios, P. Zabinski, N. Elezovic and N. Krstajic, *Nano Energy*, 2018, **47**, 527-538.
29. Y. Wang, H. Y. Zhuo, X. Zhang, X. P. Dai, K. M. Yu, C. L. Luan, L. Yu, Y. Xiao, J. Li, M. L. Wang and F. Gao, *Nano Energy*, 2018, **48**, 590-599.
30. N. Zhang, Q. Shao, Y. C. Pi, J. Guo and X. Q. Huang, *Chem. Mat.*, 2017, **29**, 5009-5015.
31. X. Zeng, J. Shui, X. Liu, Q. Liu, Y. Li, J. Shang, L. Zheng and R. Yu, *Adv. Energy Mater.*, 2018, **8**, 1701345.
32. Z. Wang, X. Ren, Y. Luo, L. Wang, G. Cui, F. Xie, H. Wang, Y. Xie and X. Sun, *Nanoscale*, 2018, **10**, 12302-12307.
33. Y. Wang, L. Chen, X. Yu, Y. Wang and G. Zheng, *Adv. Energy Mater.*, 2017, **7**, 1804361.
34. Q. Chen, Z. Cao, G. Du, Q. Kuang, J. Huang, Z. Xie and L. Zheng, *Nano Energy*, 2017, **39**, 582-589.
